# Supplementary material
Source: PubMed Central journal article supplement (PMC7964860)
Supplement: 15-00186.pdf [file 15-00186.pdf]

**On-line Table: Patient demographic data and the size, weight, and location of parathyroid adenomas**

|    | Age (yr) | Sex | Preop PTH | Preop Calcium | Location of PTA            | Size by Path (mm) | Weight (g) |
|----|----------|-----|-----------|---------------|----------------------------|-------------------|------------|
| 1  | 36       | M   | 95        | 9.9           | R/sup                      | 13 × 8 × 4        | 0.51       |
| 2  | 72       | F   | 76        | 10.6          | L/inf                      | 14 × 11 × 7       | 0.13       |
| 3  | 61       | F   | 118       | 10.6          | Intrathyroid (subcapsular) | 4 × 3 × 4         | NA         |
| 4  | 68       | F   | 120       | 11.2          | R/sup                      | 21 × 11 × 6       | 0.8        |
| 5  | 61       | F   | 68        | 10.1          | L/sup                      | 15 × 8 × 5        | NA         |
| 6  | 71       | M   | 117       | 11.4          | Mediastinal                | 25 × 10 × 5       | 0.71       |
| 7  | 51       | F   | 163       | 10.9          | L/sup                      | 18 × 7 × 5        | 0.4        |
| 8  | 58       | F   | 98        | 10.4          | L/sup                      | 14 × 8 × 6        | 0.44       |
| 9  | 77       | F   | 67        | 11.9          | R/inf                      | 25 × 5 × 4        | 0.55       |
| 10 | 66       | F   | 67        | 10.9          | R/sup                      | 6 × 6 × 2         | 0.1        |
| 11 | 57       | F   | 84        | 10.4          | L/sup                      | 10 × 5 × 4        | 0.75       |
| 12 | 78       | M   | 148       | 10.6          | L/sup                      | 15 × 9 × 3        | 0.3        |
| 13 | 51       | F   | 160       | 11.6          | L/inf                      | 14 × 10 × 5       | 0.3        |
| 14 | 78       | M   | 76        | 10.6          | R/inf                      | 12 × 9 × 5        | 0.27       |
| 15 | 69       | M   | 52        | 10.7          | L/sup                      | 12 × 6 × 3        | 0.18       |
| 16 | 79       | M   | 99        | 10.1          | R/inf                      | 14 × 8 × 4        | 0.4        |
| 17 | 39       | F   | 94        | 11            | R/sup                      | 16 × 12 × 7       | 0.75       |
| 18 | 79       | F   | 81        | 11.3          | L/inf                      | 14 × 7 × 11       | 0.65       |
| 19 | 58       | F   | 130       | 12            | L/sup                      | 24 × 15 × 10      | 2.2        |
| 20 | 73       | M   | 204       | 10.6          | R/sup                      | 17 × 12 × 6       | 1          |
| 21 | 48       | M   | 246       | 11.6          | L/sup                      | 16 × 14 × 10      | 1.13       |
| 22 | 45       | F   | 165       | 10.8          | L/sup                      | 8 × 6 × 2         | 0.1        |
| 23 | 27       | F   | 56        | 11            | R/sup                      | 20 × 10 × 7       | 0.7        |
| 24 | 51       | F   | 164       | 11.2          | Intrathyroid               | 5 × 7 × 6         | NA         |
| 25 | 69       | F   | 124       | 10.7          | R/sup                      | 21 × 18 × 11      | 1.7        |
| 26 | 48       | M   | 113       | 10.7          | R/sup                      | 18 × 14 × 6       | 0.76       |
| 27 | 64       | F   | 98        | 11            | R/sup                      | 15 × 11 × 7       | 0.77       |
| 28 | 65       | F   | 146       | 10.7          | L/sup                      | 36 × 23 × 14      | 4.5        |
| 29 | 47       | F   | 99        | 11.1          | L/sup                      | 15 × 13 × 7       | 0.57       |
| 30 | 61       | M   | 68        | 10.1          | R/sup                      | 4 × 3 × 2         | 0.5        |

**Note:**—PTH indicates parathyroid hormone; Preop, preoperative; Path, pathology; sup, superior; inf, inferior; R, right; L, left; NA, not available.
